# Supplementary material for: Integrated Analysis of Long Noncoding RNA Expression Profiles in Acute‐on‐Chronic Liver Failure
Source: Hindawi journal article supplement (doi:10.1155/2021/5387856), 2021-01-01

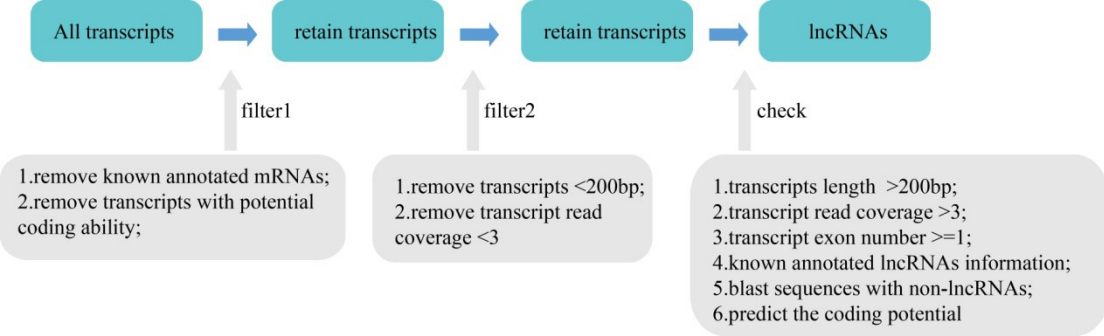

Supplement: f1 [file 5387856.f1.pdf]
